# Supplementary material for: The major nectar protein of Brassica rapa is a non-specific lipid transfer protein, BrLTP2.1, with strong antifungal activity
Source: PubMed Central journal article supplement (PMC6255697; doi:10.1093/jxb/ery319), 2018-08-31
Supplement: ery319_suppl_supplementary_tables_s1-s3.pdf [file ery319_suppl_supplementary_tables_s1-s3.pdf]

**Supplementary Table 1 -- List of nsLTPs with known or putative biological functions used for phylogenetic analysis**

| Gene                                                             | Accession #    | Function                                                                                                |
|------------------------------------------------------------------|----------------|---------------------------------------------------------------------------------------------------------|
| AtLTP1(At2g38540)                                                | NP_181388.1    | calmodulin-binding protein and cell differentiation                                                     |
| AtLTP2(At2g38530)                                                | NP_181387.1    | cuticle –cell wall interface integrity and etiolated hypocotyl permeability                             |
| AtLTP3(At5g59310)                                                | NP_568905.1    | freezing and drought stress                                                                             |
| AtLTP4(At5g59310)                                                | NP_568904.1    | pathogen defense                                                                                        |
| AtLTP5(At3g51600)                                                | NP_190728.1    | pollen tube tip growth and fertilization                                                                |
| DIR1 (AT5G48485)                                                 | NP_568699.1    | system resistance signaling                                                                             |
| AZI1 (AT4G12470.1)                                               | NP_192984.1    | systemic acquired resistance and induced systemic resistance, interacts with lipid derived azelaic acid |
| BraLTP1(Bra011229)                                               | XP_009127438.1 | epicuticular wax deposition, cell proliferation and flower development                                  |
| nsLTP[Ginkgo biloba](DQ836633)                                   | ABI26087.1     | Proteinase inhibitor                                                                                    |
| LTP2(AAA03283)[barley, cv. Bomi]                                 | Q43871.1       | antibacterial                                                                                           |
| LTP4(Q43875.1) [barley, cv. Bomi]                                | Q43875.1       | response to bacterial pathogens                                                                         |
| BcMF15(ABQ63061.1 or EF600901)[Brassica rapa subsp. oleifera]    | ABQ63061.1     | microspore development                                                                                  |
| BcLTP(ABM69132.1 or EF216852)[Brassica rapa subsp. pekinensis]   | XP_009143379.1 | secrete and combine extracellular CaM                                                                   |
| CaMF2(JF411954 or AEE92794.1)[Capsicum annuum]                   | AEE92794.1     | pollen development                                                                                      |
| LTP(AF171094 or AAD46683.1)[Lilium longiflorum cv. Nellie White] | Q9SW93.1       | pollen tube adhesion                                                                                    |
| Ace-AMP1 (AF004946.1 or AAB60896.1)[Allium cepa]                 | Q41258.1       | antimicrobial                                                                                           |
| OsC6(AK064672 or BAG89152.1)[Oryza sativa Japonica Group]        | XP_015615738.1 | postmeiotic anther development                                                                          |
| OsDIL(Os10g0148000) [Oryza sativa Japonica Group]                | AAK91879.1     | drought tolerance                                                                                       |
| MtN5(MTR_5g094210 or AET00633.1)[Medicago truncatula]            | XP_003617674.1 | efficient nodulation                                                                                    |
| NtLTP1 (AB625593 or BAK19150.1)[Nicotiana tabacum cv Xanthi]     | XP_016433981.1 | lipid secretion from glandular tissues                                                                  |
| NtLTP2(Q03461.1) [Nicotiana tobacum cv Petit Havana SR1]         | Q03461.1       | Cell wall extension                                                                                     |
| NtnsLTP2-like                                                    | XP_009631888.1 | antimicrobial resistance                                                                                |
| CALTPI (AF2088232 or AAF23458.1) [Capsicum annuum]               | AAF23458.1     | Pathogen resistance and long distance signaling                                                         |
| CALTPII (AF208833 or AAF23459.1)[Capsicum annuum]                | AAF23459.1     | Pathogen resistance and long distance signaling                                                         |

## Supplementary Table 2 – Sequences of nsLTPs used for tree building

>Bra000068

MAGLMKLACFLVACMIVAGPITANAALTCASVVSNMARCISYLGGETISGACCSGIRSINGLSR  
TPSDRQIACGCLKRVATLPNINADRAAGLPNACGVSLPYNISKSANCTLYVDFNLSRYLSLSL

>Bra001345

MRSFLLLALFLVLAFFHHGEAAVTCNNVVDLYPCLSYVMQGGNSPSTNCCSGVRTLNSQAQT  
TADRQSVCRICKNAIGGASYSSSNLKNALSPLAKCGVNLFPFSISPSTNCNR

>Bra005098

MAGLVKLACLVLACMIVAGPITSKAALSCGTVNTNVAACIGYLTQGGPLPRACCTGVSKLNSIAR  
TTPDRKQACRCLKTAASALGSGLNAGRAAGLPKACGVNVPFPISTINCNGHREISSVRMKLE  
WIIPML

>Bra005099

MAGLMKLACLVLACMIVAGPITSNAALSCGTVSGYVAPCIGYLAQGAPALPRACCSGVTSLNLL  
ARTTPDRQQACRCLVGAANAFPTLNAARAAGLPKACGVNIPYKISKTTNCNSVK

>Bra006721

MALALRFFTCLVLTVCIVASVDAAVSCGTVTSSLAPCANYLSKGGDVPPPCCAGVTKLNGMAQ  
TTPDRQQACKCLQSAAKTVSGLDPSLAAGLPKCGVSIPIYPIISMSTNCDNVK

>Bra006736

MASTLRFLTCLVTVSIVASVGAIPISCGTVVQSMSPCITYLSGRMDLTAACCGGVRDLNIAAQT  
PDRQQTCKCLQAVAKKIPGFNQTRASDLPGKCRVSFPFPISTNCDNVHHEDEEYMVYVQ

>Bra012848

MMFPSKITTTCLLVAVYMASPSESTITCGTVTSTLARCIGYLTNSGSLPSDCCVGVKSLNQMAQ  
TTPDRRQVCECLKSAAKDITGLNTDLVATLPTTCGVSVPIYPIRSTNCDTISTAV

>Bra017112

MAGVMKLVCLVLACMIVAGPITANAALTCGTVNSNVAPCIGYITQGGPLPGACCTGVSKLNSMA  
RTTPDRQQACRCLKTAASALGPSLNAGRAAGIPKACGVSVFPPISTNTNCNSVK

>Bra017113

MAGLMKLACLVLACMIVAGPITNAALSCGTVSGNLAACIGYLTQNGPLPRGCCTGVTNLNNM  
ARTTPDRQQACRCLVGAANSFPTLNAARAAGLPKACGVNIPYKISKSTNCNSVR

>Bra020322

MAIALRFFTCLVLTVCIVASVDAAITCGTVTSSLAPCATYLSGGGEVPPPCCAGVKKLNGMAQTT  
ADRQQACKCLKAAAQGINPSLASSLPKCSVSIPIYPIISMSTNCDNVK

>Bra020323

MTMGLKFFTCLVLTVCIAASVDAALTCGTVTSSLAPCATYLSKGGAVVPGPCCAGVKKLNDMA  
QTPDRQQACKCLKAAAKSINPSLASGLPGKCSVSIPIYPIISMSTNCDK

>Bra024983

MAYSKIALLLLILNVIFFTLVSSNPVPIYRKPCTCKNALFKKVCANVLDLVKVSPLPTRSKCCGLIKGLV  
DLEAAVCLAAVCLCTALKADLLGLKLNVPISLSVILNHCGKKVPSGFKCA

>Bra029172

MASALSFFTCLVLTVCIVASVDAAISCGTVTSNLVPCAGYLMKGGPVPASCCAGVSKLNSMAKT  
TPDRQQACKCLKTAAKSVNPSLASSLPGKCGVSIYPISMSTNCNT

>Bra029719

MRSLLLALFLVLAHRGEEAAVSCNAVVGDLYPCLSYVVQGGNVPANCCNGIRTLNSQAQTPVD  
RQGVCRCIKNAIGGVSFSSNNVNNAQSLPAKCGVNLPYSISPSTNCDR

>Bra036788

MEGLLKLSTLVIVCMLVSAPMASEAAISCGAVASNLGQCINYLTRGGFVPRGCCSGVRRLLNSM  
ARTTRDRQQACRCIQGAARALGSRLNPGRAARLPGACRVRIAYPISARTNCNK

>Bra036789

MAFASKIITCLLVLVKHYMAAPAESHITCGIVTSTLAQCMGYLTNFFPVPSDYCCAIEVKGLNQMAQ  
TTPDRRQVCKCLKAVAKENKGFISIELVGLTPTICGVSVPYPFNFSTNCDTISTAV

>Bra037222

MSILKSLVTIFVLGIFLTPRYSESAISCSVWLSDLQPCVSYLTSGSGQPPECCDGVRS LDAATTT  
SADKKAACQCISVANSVTVKPELAKALASNCNASLPVDASSTVDCNTVG

>Bra038907

MTFASKIITCLLVLTIIYAAPTESHITCGTVTSTMTQCISYLTNGGPLPSSCCVAVKSLNQMAQTT  
PDRRQVCECLKSAGKEIKGLNIDLVAALPTTCGVLSYPIGFNTNCDISISIAV

>Bra038908

MEGFIKSTLLIVCMLVSAPMAEAAISCGAVASNLGQCINYLTRGGFVPRGCCSGVQRLHSMAR  
TTRDRQQACRCIQGAARALGSRLNPGRAARLPGACRVRIAYPISARTNCNK

>Bra008112

MKFSCSKPVLFTCAILLLLIVAQENRVVAGQSCDPMQLIPCEEAILKGSKPSDTCCTRLNQQQH  
CVCQYMKNPNFKSFLDSPNAKKIATDCHCPKPKC

>Bra008375

MKFTGVVCI AFVIVLV SASAPTKEVLEEKVACNSTEHITCIPALQSGSQPSAECCGKLKEEESCL  
CGYIQNPLFSQYVTSANVHMLVTCGIPYPSC

>Bra014154

MVKVMWGSSSLALAAALLLVTVANIPVAEGVTCSPTELTSCSSAFMSASPPSATCCA KLREQKP  
CLCGYLRNPALSQYVNSPNAKKVASSCNVATPKC

>Bra015966

MKASCTKPV LITCTILLLLIVAQENRVAAAEQCNPMLPCEDAIMKGSTPSNECCTRLKQQQH  
CICQYMKNPNFKSFLNSPNAKMVASHCQCKPKC

>Bra018687

MNFTGAICIAFVIVLVSSLALTNAAVEDEKVLACNPKELNPCSPAVKTGSKPSTECCAMLKKEEP  
CLCGYINDPVYGGYIKSKNAHKAFSSCGIPPLSC

>Bra021299

MEMIKAKWVSIVALAAIFLVVILVPAAEAVTCSMQLSPCASAITSSSQTSALCCA KLKEQKPCLC

GYMRNRSRRFVSSPNARKVSNRCKLPIPRC

>Bra022308

MVMIKATWVSIFAIAAVLLVILAPAAEAVTCSPMQLSPCAQAITSSSPPSALCCA KLKEQKPCLC  
GYMRNPSLRRFVSSPNARKVSNRCKLPIPRC

>Bra025378

MKLT AIGLVAMVTIVVQLSPTMACDVKDLSPCLLP IAVFPESPTAACCCQTLRDQGPCLCVFINNS  
WIWIGPTLTSPNGHKLFAACQVFPFSCGN

>Bra027111

MKFTGAICIALVIVLVSSDLTSAAVEEEEIKVACVVTELIPCLESSIIGVHPYPECCVTLKAQQSCL  
CGYIQNPVYGGFFKNAHSVFTGCGVPYPTC

>Bra027114

MKFTGAICIALVIVLVSSDLTSAAVEEEEIKVACVQTELIPCFVAAFISQPSAECCEKLKEQQSCL  
CGYISNPVFGQFYKNAQNVFKACGVPYPTC

>Bra028162

MKFTTLMVITLVIIAMSSPVPIRATSVESFGEVAQSCVVTELAPCLPAMTTAGDPTTECCDKLVE  
QKPCLCGYIRNPAYSMYVTSPNGRKLDFCKVFPFSC

>Bra030699

MRFTGVVCI AFVIVLV SALAPTKADLEEKVACI TELMTCIPALQTGSQPSAECCKLKEQESCL  
CGYIQNPLFSQYVTSENAHKILATCGIPYPTC

>Bra032265

MVKVMWV FVLALVAALLLVTEKIPVAEGVTC SVTELS PCLAAFMSSSQPSASCCA KLREQKP  
CLCGYMRNPGLRQYVTSPNAKKVSNCKVASPNC

>Bra033084

MKFTTLASIAFVVVLFSSSTAAPINSQLIQSNSPCTTIDITGCVPAIYGAPLSPECCRNLNQQP  
CYCDFIKNAGLKP YITSPQGHAAALASCGIPYPTC

>Bra040627

MVLTLMVFVILLTFPAPNEAADTNVEAACDPKQLQPCLAAITGGGQPSGDCCA KLKEQQPCLC  
GFSKNPAFAQYISSPNSRKVLTACGIPYPSC

>Bra009282

MEFLKSFTTILFVMFLAMSALETVPMVRAQQCLDNLSNMQVCAPLVLP GAVNPAPNSNCCIALQ  
ATNKDCICNALRAATTFTTTCNLPSLDCGITI

>Bra028294

MVSISSSSKSSTIMKVVMVAVVLVATVVDGQSCNTHLSGLNVCGEFVVP GADTTNPSAEC CN  
ALEAVPSDCICNTFRIASRLPTRCNIPTLSCN

>Bra029135

MIMKVAALVALVLVATEVDGQSCNRHLSGLNVCGEFVVP GADKTNPSAEC CSALEAVPSECLC  
NTMRIASRLPTRCSIPTLSCS

>Bra002906

MDENNTRTIVAALVIVFVSLVLMEEPTSIPLCNINANTLEKCRPAVTGNNPPLPGDACCIVLQAAD  
LECVCKFKSHIPILATKSHKVHDLLRKCGIKTIPPACQDKTKVS

>Bra002907

MGKNNTKILITALVMIVTASMMIEEAKSVRICNVSTKDLKKCRPAVTGNNPPPPTPQCCQLAKAA  
NLECLCPFLSRSGIDPSKIKALGANCGITKNPSCLPW

>Bra002914

MGKNNTKILVTALVMVVTAAMMIEEATSIPICGVNTNDLKKCSPAVTGNNPPPPTPQCCQVAKA  
ANLECLCPYFTRSGLDTAKIKALGTNCGITKKPSCLPW

>Bra020696

MASKKVGVMVMMMMIVVMAIFAERSVAIDLCGMTQSELNECKPAVSKENPTNPSTLCCDYLK  
HADISCLCGYKNSPLLGSFGIDPALAAGLPTKCDMPNAPTC

>Bra020839

MAYVNKVSAAVAILFFAVAVAPLLAEPQTPMFPKMDPVCASLMPNLEKCFSTVRETPTDDCCS  
DLKSATTTQVTCLCDNYIANPAVVNFTGPYSAGITTKCGVFDKYSCNGSSNGT

>Bra022364

MEPNTKLVVITLVLALTLTAATGEFCGMSVSDLYSCKPYVQSKNPVTS AIDPKGPCCTALSKAD  
FQCLCKQKTKTNPFLSSIDL DLASKLPEKCGLSGATC

>Bra028980 (BraNeLTP)

MGKNNTTILIAMVLTTAMIMIEEAKSYPICNTDTNDLQKCSPAVTGNNPPAPGPDCCAVAKSADL  
ECLCPYLSLSGIDPSKIKSVLASCVGGNPSCLSW

>Bra035573

MGKNNTNILTQSTVLAMVLTAAIMVKEVSSLTICKIDINDMQKCRPAVIGINPPPPVNECCVVVRS  
ANLECFCGFKFYLPILGIDPSKVAALVAKCDVTTIPPSCQVSKVLASRSLKNGA

>Bra005153

MKWCKFISVALMSLLITLASVEAAGECGRMPIGQAAASLSPCLAATKNPRGKVPPVCCA KVGAL  
IRTNPRCLCAVMLSPLAKKAGINPGVAIAIPKRCNIRNRPSGKRCGRYIVP

>Bra014853

MASFMKFLCVLGLFLLVGTVDGAGECGRSTPDNEAMKLAPCVGAAQDANA AVPGGCCAQIK  
RFSQNP KCLCAVLLSDTAKASGVQPEVAL TIPKRCNFANRPVGYKCGVLRVQIHGLYDEALEFT  
TTS

>Bra011229 (BraLTP1) (XP\_009127438.1)

MATGSRVLIGLAMILII SGELLVPGQGT CQGDIEGLMRECAVYVQRPGPKVNPSAACCKVVKRS  
DIPCACGRITPSVQKMIDMNKVVLVTSFCGRPLAHGTKCGSKSVIN

>Bra034567

MGSGMITVMVVAIAFFMIGSDNVNMATAQLCGANLSGLVNECQRYVSNAGPNSPPPSRSCCA  
LIRPIDIPCGCRYVTRDVMNTFDMDKLIYVARSCGKKIPSGYKCGSYTIPAA

>Bra034568

MASGRIIIMVVAIAFFMIGSDNVNVATAQFCGANVSGLMNECQRYVSNAGPNSPPPSRSCCALI  
RPIDVPCACRYVSRDVTNYIDMDKVYVARSCGKKIPSGYKCGSYTIPAA

>Bra034570

MASGRIIIIMVVAIAFFMIGSDNVNVATAQFCGANVSGLMNECQRYVSNAGPNSPPPSRSCCALI  
RPIDVPCACRYVSRDVTNYIDMDKVYVARSCGKKIPSGYKCGSYTIPAA

>Bra015984

MEICKFLTVIFVAIVVLYSVQAAEQGGDHHSMACMQKLMPCQNYIHAVNPAPPASCCGPMKEIV  
EKDSKCLCTVFNNPELLKSLNLTKENALDLPKACGVNPDVSICTKTACKFFIIFSTKIPHIYFI

>Bra001252

MILMVLVESGLLKEATAHPCGRTFLSALIELVPCTLSVVPFSTLSPNEPCCTAIKTLGQPCLCVIA  
NGPSIPGVDHTLALQLPGKCSANFPPCN

>Bra006901

MKAMRVGLAMALLMTITVLTIVTAQLEDQQPPPPMLPEEEVGGCSRTFFSALVQLIPCRAAVAP  
FSPPIPTQSCSAVVTLGRPCLCLLANGPPLSGIDRSMALQLPQRCSANFPPCDIIN

>Bra012819

MMMRPMPRVGLAMALLMTITVLTIVIAQQEDQQPPPPMLPVEEVGMCSRTFFSALVQLIPCRAAV  
APFSPIPTESCCSAVVTLGRPCLCLLANGPPLSGIDRSMALQLPQRCFANFPPCDVIN

>Bra000287

MAAKTSTILITIFLVINLLFLNFIPLVVAENTCPRDQLKLSTCANILNLINLNLGAPAMRPCCSVLLG  
LIDLIALCFCSALKLSILGITNTPIHLNLALNACGGTLPDGFRCPT

>Bra018483

MAPRTSLALFLFNLLFFTYTTAAGTTCPRNALQIGACTNVLNALDLTLGNPPPPVPPCCSLIAGLA  
DLEAAVCLCTALDVNVLGNVHLPIDISVLLNACSRFAPPSFQCP

>Bra018544

MAISKAFPLLLVLLLVLNSTFSFCHAVKQCPPPRKQSSMKCPRDTVKFGVCGSWLGLVHEVIGT  
PPSQECCSLVKGLADLEAALCLCTALKTSLLGVAPVKLPVALTLLLNSCGKTLPPQGFVC

>Bra024980

MAYSKIALLLLILNVIFFTLVSSNPVYPYRKPTCKNALKFKVCANVLDLVKVSPLPTRSKCCGLIKGLV  
DLEAAVCLCTALKADLLGLKLNVPISLSVILNHCGKKVPSGFKCA

>Bra024981

MAYSKIALLLLILNVIFFTLVSSNPVYPYRKPTCKNALKFKVCANVLDLVKVSPLPTRSKCCGLIKGLV  
DLEAAVCLCTALKADLLGLKLNVPISLSVILNHCGKKVPSGFKCA

>Bra024982

MAYSKIALLLLILNVIFFTLVSSNPVYPYRKPTCKNALKFKVCANVLDLVKVSPLPTRSKCCGLIKGLV  
DLEAAVCLCTALKADLLGLKLNVPISLSVILNHCGKKVPSGFKCA

>Bra024207

MKIHRAILVTLALIKTAVSQLQSIEQCREVFDSFMPCMGFVEGIFEQPSPQCCRGVSHLNNV  
KFKTPGSRKNEQGTGQLERVCECIEMMGKSDHLPFLASAINNLPPLCSLSLSPISVGMDCSQF  
RNMKELDAEKVN

>Bra040156

MMMMRVAFAMTCMLFAITTADKDRPWPRECLEVANVMVEECKLFFVEQESPTAECCGWF  
SSRREKAKDRRRICRCMEFLTTAFEAIKPSVLALSDQCHFGGGFPISKNHACACKLHSFDQTL

>AtLTP1 (NP\_181388.1)

MAGVMKLACLLACMIVAGPITSNAALSCGSVNSNLAACIGYVLQGGVIPPACCSGVKNLNSIAK  
TTPDRQQACNCIQGAARALGSGLNAGRAAGIPKACGVNIPYKISTSTNCKTVR

>AtLTP2 (NP\_181387.1)

MAGVMKLACMVLACMIVAGPITANALMSCGTVNGNLAGCIAYLTRGAPLTQGCCNGVTNLKNM  
ASTTPDRQQACRCLQSAAKAVGPGLNTARAAGLPSACKVNIPYKISASTNCNTVR

>AtLTP3 (NP\_568905.1)

MAFALRFFTCVLTVCVIVASVDAAISCGTVAGSLAPCATYLSKGGVPPSCCAGVKTLSMAKT  
TPDRQQACRCIQSTAKSISGLNPSLASGLPGKCGVSIPYPIISMSTNCNNIK

>AtLTP4 (NP\_568904.1)

MAFALRFFTCFVLTVFIVASVDAAITCGTVASSLSPCLGYLSKGGVPPPCAGVKKLNGMAQT  
TPDRQQACRCLQSAAKGVNPSLASGLPGKCGVSIPYPISTSTNCATIK

>AtLTP5 (NP\_190728.1)

MEGLLKLSTLVIVCMLVTAPMASEAAISCGAVTGSLGQCYNYLTRGGFIPRGCCSGVQRLNSLA  
RTTRDRQQACRCIQGAARALGSRLNAGRAARLPGACRVRISYPISARTNCNTVR

>AtDIR1 (NP\_568699.1)

MASKKAAMVMMAMIVIMAMLVDTSVAILDCGMSQDELNECKPAVSKENPTSPSQPCCTALQH  
ADFACLCGYKNPWLGSFGVDPELASALPKQCGLANAPTC

>AtAZI1 (NP\_192984.1)

MASKNSASLALFFALNILFFTLTVATNCNCKPSPKPKVPSPKPKVQCPPPPRPSVPSNPRP  
VTPPRTPGSSGNSCIDALKLGVCANVLSLLNIQLGQPSSQQCCSLIQGLVDVDAIICLCTALR  
ANVLGINLNVPISSLVLLNVCNRKLPSGFQCA

>AtAZI7 (NP\_192990.1)

MSMAPKTSTTLALFLVTNILFLNLITLSCADNTCPRDVLKLTCSNVLNINLKLKLGAPAMRPCCSIL  
FGLIDLDAVCLCTALKLSLLGITIDTPIHLNLALNACGGTLPDGFRCPT

>GbTP (ABI26087.1)

MMKISWQLWLLVAFVAVMVCVWTPLSTAAPGCDTVDLAPCISYLQTGTGNPTVQCCSGVKT  
LAGTAQTTEDRKAICECIKTAAIRVKPVANAVKSLPGLCSVTLPPFISIAATDCNKIV

>HvLTP2 (Q43871.1)

MARTAATKLALVALVAAMLLVAADAAITCGQVSSALGPCAAYAKGSGTSPSAGCCSGVKRLAG  
LARSTADKQATCRCLKSVAGAYNAGRAAGIPSRGVSVPYTIASVDCSKIH

>HvLTP4 (Q43875.1)

MARAAATQLVLVAMVAAMLIVATDAAISCGQVSSALSPCISYARGNGAKPPVACCSGVKRLAG  
AAQSTADKQAACKCIKSAAGGLNAGKAAGIPSMCGVSVPYAISASVDCSKIR

>BcMF15 (ABQ63061.1)

MKLISLMCIAFVILLTSFPATAITFNPACIKNHDTGGLVAVKGRWRPECCKIWSGNVLPETRQ  
CACYVLKHSFLGNGVLPLILAKCKLGGIEQFKCEVET

>BcLTP (XP\_009143379.1)

MAGLMKLA<sup>~</sup>CLVLACMIVAGPITSNAALSCGTVSGYVAPCIGYLAQGAPALPRACCSGVTSLNNL  
ARTTPDRQQACRCLVGAANAFPTLNAARAAGLPKACGVNIPYKISKTTNCNSVK

>CaMF2 (AEE92794.1)

MADVKSSVSLFLLGLLVVVLQSGVIECQPQICNPSLTSLNVCAPFVVPGAPSASAECCCTALQSI  
NHGCMCDTMRIAAQIPAQC�LPPLSCAAN

>LILTP (Q9SW93.1)

MARSSAVCFLLLLAFLIGTASAITCGQVDSDLTSCLYARKGGVIPPGCCAGVRTLNNLAKTTPD  
RQTACNCLKSLVNPSLGLNAAIVAGIPGKCGVNIPYPIRMQTD<sup>~</sup>CNKVR

>AceAMP1 (Q41258.1)

MVRVVSLLAASTFILLIMIISPPYANSQNICPRVNRIVTPCVAYGLGRAPIAPCCRALNDLRFVNTR  
NLRRAACRCLVGVNRRNPGLRRNPRFQNI<sup>~</sup>PRDCRNTFVRPFWWRPRIQCGRINLTDKLIYLDA  
EE

>OsC6 (XP\_015615738.1)

MAPSKSTAAAGVLLVLLVAAAGGGAAEAATTCVASLLELSPCLPFFKDKAATAAPEGCCAGLSS  
IVKGEAVCLCHIVNHTLERAIGVDIPVDRAFALLRDVCRLSPADIISTCANEKGGVPPLYSCPAP  
SA

>OsDIL (AAK91879.1)

MSQLKSSSLAALLIFLLAVFTTAAAAAGTECQNDVEVLKTTTCYKFVEKDGPKLQSPDCCTSMK  
GVNVPCVCTYLGSPGVRDNINMDKVFYVTKQCGIAIPGNCGGEQASLDWPH

>MtN5 (XP\_003617674.1)

MAHSQGKALAQWMIGALLFAMLAGSLAVQICNIDPNDLKQSCSKFVTGRNPPRADEACCGVLR  
RANLPCLCGYKSALTYYGINAKKALALPGQCGLQTPSNC

>NtLTP1 (XP\_016433981.1)

MEMVSKIACFVVL<sup>~</sup>CMVVVAPHA<sup>~</sup>EALTCGQVQSSLAPCVPYLLGRGPLGGCCGGVKRLLGAAR  
TPADRKTACNCLKSAANTFKGIDMGNAARLPGTCGVNIPYKISPSTDCSKVQ

>NtLTP2 (Q03461.1)

MEMVGKIACFVVL<sup>~</sup>CMVVVAPHA<sup>~</sup>EALSCGQVQSGLAPCLPYLQGRGPLGSCCGGVKGLLGAAK  
SLSDRKTACTCLKSAANA<sup>~</sup>IKGIDMGKAAGLPGACGVNIPYKISPSTDCSKVQ

>NtnsLTP2-like (XP\_009631888.1)

MEIAGKIACFVVL<sup>~</sup>CMVVAAPCAEAITCGQVTSNLAPCLAYLRNTGPLGRCCGGVKALVNSARTT  
EDRQIACTCLKSAAG<sup>~</sup>AISGINLGKAAGLPSTCGVNIPYKISPSTDCSKVQ

>CaLTPI (AAF23458.1)

MLTDFVRGVD<sup>~</sup>CPHAEAVTCGQIQVGVVNCLPYLQNRGPLGRCCGVIKDLLKCKTPHERRKSC  
KCVKTAANTIKGIDFGKAAGLSGVC<sup>~</sup>GVKIPFEISPSVDCSKVK

>CaLTPII (AAF23459.1)

MDMFGKIACFVLL<sup>~</sup>CMVVVAPSAEALSCS<sup>~</sup>QVTSGLAPCLPYLQGRGPLGGCCSGVKDLLAAAKT  
PADRKTACTCMKSTANSIKGIDAGKAASIPATCGVNIPYKISPSTDC<sup>~</sup>TKVE



**Supplementary Table 3 – Oligonucleotides used in this study**

| <b>Primer name</b>      | <b>Primer Sequence (5'→3')</b>                     | <b>Used For</b>        |
|-------------------------|----------------------------------------------------|------------------------|
| pMDC85 LTP XbaI F       | AAA AAA TCT AGA ATG GGT AAG AAC AAT ACC ACA        | Cloning into pMDC85    |
| pMDC85 LTP AscI R       | AAA AAA GGC GCG CC T CAG GAG GGA TTG CCC ACG<br>CC | Cloning into pMDC85    |
| neLTP pET21a-F<br>BamHI | AAA GGA TCC TAT CCT ATA TGC AAC AC                 | Cloning into pET21a(+) |
| neLTP pET21a-R XhoI     | AAA CTC GAG TGA CAA ACA GGA GGG AT                 | Cloning into pET21a(+) |
